# Supplementary material for: When does self-report of pain occur?: A study of older adults
Source: PeerJ. 2022 Jul 19;10:e13716. doi: 10.7717/peerj.13716 (PMC9306549; doi:10.7717/peerj.13716)
Supplement: Supplemental Information 1 [file peerj-10-13716-s001.xlsx]

## Sheet: Presonal_data
Participant	Age	Sex	Education	Place	Other	Where it was use?	Comments	Activities	Date	Time
1	77	F	primary	Home		waist bag	did not report because the pain did not change, not because he was afraid to use the device.	Laundry Water the flowers eleven flatten	2018-01-20	18:45-21:45
2	60	F	primary	Home		waist bag	Live alone	sat down to drink mate (1 hour) lift walk wash slab house trade Sat down went to the bathroom	2018-01-21	17:20-20:20
3	61	F	Technical	Home		waist bag	Lives with husband, works	She worked as a podiatrist (sitting) Sitting	2018-01-22	17:30-20:30
4	63	M	Secundario	Home	Right shoulder and hand mobility problem	on the table	do not use the bag because the device could be placed on a table, so he remembered to use it	Sitting Working (count sheets)	2018-01-25	16:35-19:35
5	77	M	primary	Nursing home	not sighted	shirt pocket	use cane	He was sitting listening to television went to the bathroom got up to stretch went to mass he was lunch	2018-02-05	10:16-1:16
6	73	M	high school	Nursing home		shirt pocket	Pain is temporary, it is not chronic	sitting reading got up to stretch Around 11:50 he gets up and moves the chair 12:45 moved the chair and went to lunch	2018-02-07	10:55-01:55
7	73	M	primary	Nursing home		shirt pocket	can leave home	Sitting speak 2:40 p.m. sat down to watch TV 15:00 sat down to read the newspaper 15:54 I walk around	2018-02-07	14:25-17:25
8	73	M	primary	Nursing home	New	waist bag	was a little unsteady because of the headache	He walked around sat while reading He went to bed because of a headache Lunched	2018-02-08	10:30-1:30
9	65	M	primary	Nursing home	Wheelchair	shirt pocket	didn't use it because he felt better and he forgot about the pain	Speak He saw tv Lunched	2018-02-08	11:09-02:09
10	73	M	primary	Nursing home	Wheelchair	shirt pocket	hardly speaks due to a stroke and mobility problems in his hands. Help	They bathed him (they took his watch away for a while) He sat went to mass It was lunch	2018-02-12	10:38-1:38
11	67	M	primary	Nursing home	Wheelchair	waist bag	Very cheerful and willing to collaborate	Watch television going to have lunch Watch TV again	2018-02-12	11:14-14:14
12	77	M	high school	Nursing home	Wheelchair	waist bag	amyotrophic lateral sclerosis (ALS, Lou Gehrig's or Stephen Hawking's disease) 18 years. He doesn't walk and he doesn't talk, but he communicates with an alphabet board.	He was in the room carrying the wheelchair I use the cell phone I went out into the hall	2018-02-12	14:56-17:56
13	66	M	primary	Home		shirt pocket	He lives with his family, spends in a room of the house	Watch TV went to the bathroom go up to the second floor slept	2018-02-16	20:00-23:00
14	60	F	primary	Home	take care of your grandson	waist bag	Live with his family	He saw tv made eleven He gave milk to the raised grandson washed (washing machine) neighborhood the house clean the jardin floor made food change to the baby Eat	2018-02-17	16:26-19:26
15	76	F	primary	Home		waist bag	She lives alone, but she does not leave her house and every day a son takes care of her at night	Eat watched tv wash dishes He fed the cat and dog talk with the daughter	2018-02-17	22:13-1:13
16	60	F	primary	Home		waist bag	He lives with his family and helps in the church, in front of the house	Kitchen have lunch I wash dishes He sat down to talk to his niece.	2018-02-21	14:25-17:25
17	60	F	primary	Home		on the table	lives with her husband	He sat down to watch television I went out to see the dog I'm sorry to talk to the cousin	2018-02-21	18:43-21:43
18	65	F	primary	Home		waist bag	He lives with his family, he spends all day at home, he only goes out on errands	Go to the grocery store Go to the bathroom Resting sitting up and in bed fold the clothes	2018-02-28	15:50-18:50
19	60	M	primary	Home	Problems in a left arm, destruction of the ligaments	shirt pocket	He lives with his wife and two children.	He was talking to the wife and sister-in-law Played alphabet soup standing up play pool with the son	2018-02-28	19:35-22:35
20	60	F	primary	Home		waist bag	He lives with his wife and a son, he was a seamstress	cooked ate I drink water (a lot) rested sitting saw the cell phone	2018-03-01	20:32-23:32
21	68	M	primary	Home	feel pain but very little	on the table	He lives with his wife and a son	Bath cover parakeets walk in the house Call-sitting To eat sitting watch tv Dishwashing	2018-03-01	18:00-21:00
22	87	M	primary	Nursing home	has a wound on his left foot	waist bag	He has no family and is very religious.	He went to Healing I fix the piece He went to mass and the rosary Lunched He rested sitting	2018-03-12	10:55-13:55
23	72	F	Primaria	Nursing home	It is very lively	waist bag	Her husband and two children died.	Sitting talking to people He went to mass and the rosary Lunched rested sitting	2018-04-13	10:47-13:47
24	85	F	high school	Nursing home	It has pain, it is active within the NH	waist bag		She spoke with another friend Went to a meeting outside the NH Lunched slept	2018-04-13	11:35-14:35
average	69.0833
D.E	8.14497
F	11
M	13
	24

## Sheet: Survey
Participante	HD	Comentario	Anxiety	Depresion	SUS	Pain area	treatment	relieves	use the 24 hour treatment	Comments	Pain Severity	Pain Interference	Relationship emotion Pain
1	No	mobile: call and receive	Y	Y	97.5	Spine, hand, feet	pills and yoga	0.5	y		6	4.42857	Y
2	Low	mobile: call and receive, whatsapp y youtube	N	N	90	Knees	pills	0.8	y		2.5	1.28571	Y
3	AB		N	N	100	Sciatica	pills	1	y		6.75	3.28571	N
4	Basic		Y	Y	95	Sciatica, shoulder	pills	0.3	y		4.75	5.85714	Y
5	No	No mobile	N	Y	90	Tailbone	No				7.75	7.83333	Y
6	No	mobile: call and receive	N	N	90	Sciatica, knees	exercises	0	y		0	0.833333	Y
7	No	No mobile	N	N	85	Sciatica	No				0	0	Y
8	No	No mobile	Y	Y	80	Sciatica, shoulder	No				5.5	5.83333	Y
9	No	mobile: call and receive	Y	Y	90	Leg	therapy	0.5	y		7.5	8	Y
10	NO	No mobile	Y	Y	90	Head, belly, leg	pills, therapy	0.5	y		4.75	4	So so
11	NO	mobile: call and receive	N	N	90	Leg	pills	0.8	y		2.75	5.5	So so
12	Basic	Tiene celular	N	Y	30	Head, hand, knee	pills and therapy	0.8	y		5	6.2	Y
13	Low	mobile: call and receive, whatsapp y facebook	N	N	92.5	Shoulder	pills	0.8			2.75	3.85714	Y
14	Low	mobile: call and receive, whatsapp y facebook	N	N	97.6	knee, neck	pills and reflexology	1	y		3	1.14286	Y
15	NO	No mobile	Y	Y	90	knee, spine	pills	0.5	y		5	7	Y
16	Low	mobile: call and receive, whatsapp y facebook	Y	Y	100	knee, shoulder	pills	0.5	y		2.75	3.57143	N
17	Basic		N	N	100	Arm	therapy	1	y		0	0	Y
18	Low	mobile: call and receive, whatsapp y facebook	N	N	100	Neck, wrist	pills and exercises	1	y		3	1.14286	Y
19	Low	mobile: call and receive, whatsapp y facebook	N	Y	90	Waist	pills	0.7	y		4.25	2.85714	N
20	Low	mobile: call and receive, whatsapp, youtube y facebook	N	N	80	Neck, wrist	No				3	2.57143	Y
21	NO	mobile: call and receive whatsapp	N	Y	97.5	Waist	No				0.75	0.428571	N
22	NO	mobile: see the time	N	N	65	Leg, eye	No				4.5	3	N
23	NO	No mobile	N	N	90	Knees	yes	0.5	No		2.75	1.66667	Y
24	Low	NR	Y	N	72.5	Shoulder, back, knee	yes	0.3	No		2.5	0	N
Averege		10			87.6083						3.70238	3.60136	16 = Y
													6 = N
				No	95.4167								2 = MM
				No-primary	90
		Home	94.6231	Primary	90
		Nursing	79.3182	High school	81.6667
				Low	90.325
				Primary	92.8714
				High school	72.5
				Basic
				High school	62.5
				Primary	100
				AB
				Tecnhic	100

## Sheet: Relationship emotion Pain
Participant	Pain Severity	Pain Interference	Emotional
P1	6	4.42857	2	y
P2	2.5	1.28571	0	y
P3	6.75	3.28571	0	y
P4	4.75	5.85714	2	y
P5	7.75	7.83333	1	y
P6	0	0.833333	0	y
P7	0	0	0	y
P8	5.5	5.83333	2	y
P9	7.5	8	2	y
P10	4.75	4	2	y
P11	2.75	5.5	0	y
P12	5	6.2	1	y	pain interferencia
P13	2.75	3.85714	0	y
P14	3	1.14286	0
P15	5	7	2	y
P16	2.75	3.57143	2	y
P17	0	0	0	y
P18	3	1.14286	0
P19	4.25	2.85714	1	y
P20	3	2.57143	0	y
P21	0.75	0.428571	1	y
P22	4.5	3	0	y				Pain severity
P23	2.75	1.66667	0	y
P24	2.5	0	1	y
Participant	Emotional	Number
1	2	1		Emotional state	Average times reported
2	0	3		Ansiedad y Depresion	3
3	0	5		Ansiedad o Depresion	2.8
4	2	2		Sin ansiedad o depresión	3.83333
5	1	3
6	0	3
7	0	3
8	2	4
9	2	1
10	2	3
11	0	4
12	1	3
13	0	4
14	0	3
15	2	4
16	2	3
17	0	4
18	0	7
19	1	2
20	0	2
21	1	2
22	0	3
23	0	5
24	1	4

## Sheet: Pain-context
Participant 1
Time	Step	Report	Heart rate	Activity
0		3	77	medium
10			65		0					Time	Report	RC	Number RC	Total RC-R		Steps	Total Steps-R	Number steps-R
20	104		76							0		61	1				62	0
30			72							10		64	9				73
40	36		73							20		65	7			104	176
50			70							30		65	7				72
60	112		72							40		66	10			36	112
70			72							50		67	11				78
80			69							60		68	9			112	189
90			69							70		68	9				77
100			61							80		69	7				76
110			65							90		69	7				76
120			64							100		69	7				76
130			69							110		70	10				80
140			68							120		72	13				85
150			67							130		72	13				85
160			68							140		72	13				85
170			72							150		72	13				85
180			66							160		73	10				83
										170		76	8				84
Participant 2										180		77	6				83
Time	Step	Report	Heart rate	Activity												252	252
0		4	77	medium
10	26		75									RC	Range B	Ra			Steps	Range A	Report	Range B	Ra	Rb
20			71									61	1	#REF!			26	2	3	1	9	3
30			70									64						3
40		4	81									65						4
50	43		82									65		Ua							Ua	Ub
60			80									66		#REF!			43	3	1		0	1
70	11		80									67
80			74									68					11
90			86									68
100	26		86									69		U							U	0	Significance
110			86									69					26						0.05
120			95									69
130			96									70		Ucal							Ucal	0	NO
140			95									72		U table							U table	___
150	9	3	89									72
160	16		74									72					9
170	17		91									72					16
180			85									73					17
												76
Participant 3												77
Time	Step	Report	Heart rate	Activity	problem with steps
0		10	98	lower
10	67		96
20	230	8	93
30	631		116
40			97
50	552		92
60	173		95
70		7	91
80	148		90
90			95
100	123		87
110		4	80
120			88
130			95
140			91
150	60	3	107
160	617		83
170			85
180	488		83
P4	sin datos
Participant 5
Time	Step	Report	Heart rate	Activity
0		5	72	lower
10		8	66
20			64
30			59
40			59
50			62
60	13		62
70		8	74
80	45		65
90			71
100			92
110			57
120			57
130			57
140			86
150			70
160			71
170			73
180	12		79
Participant 6
Time	Step	Report	Heart rate	Activity
0		3	83	lower
10			75
20	7		82
30	17		84
40	270		73
50			68
60			68
70			67
80			72
90			66
100			67
110		10	108
120			84
130	50		84
140		10	86
150			118
160	361		80
170			81
180			67
Participant 7
Time	Step	Report	Heart rate	Activity
0		0	87	medium
10			84
20			86
30			92
40	106		94
50	72		110
60			93
70	68		90
80			88
90		0	100
100	73		109
110	45		105
120		1	107
130	41		97
140	19		94
150			96
160			97
170	54		92
180			100
Participant 8
Time	Step	Report	Heart rate	Activity
0			88	lower
10	19	5	94
20			95
30			70
40			72
50	104		64
60	37	6	79
70			102
80			78
90	13	7	68
100			67
110			65
120		6	76
130			66
140	61		105
150			69
160			56
170			66
180	52		62
Participant 9
Time	Step	Report	Heart rate	Activity	was happy
0	0	3	95	lower
10	0		82
20	0		93
30	0		84
40	0		124
50	0		91
60	0		82
70	0		96
80	0		120
90	0		92
100	0		95
110	0		94
120	0		92
130	0		91
140	0		126
150	0		114
160	0		86
170	0		114
180	0		84
Participant 10
Time	Step	Report	Heart rate	Activity
0		7	87	lower
10			80
20			91
30
40			105
50		8	81
60			83
70			87
80			72
90			71
100			81
110			75
120		6	79
130			79
140			82
150			81
160			83
170			78
180			68
Participant 11
Time	Step	Report	Heart rate	Activity
0		5	84	lower
10		5	73
20			78
30			78
40			64
50		5	64
60			59
70			57
80			62
90			62
100			63
110			68
120			70
130			67
140		6	64
150			71
160			67
170			67
180			65
Participant 12
Time	Step	Report	Heart rate	Activity
0		5	78	lower
10			62
20			74
30			70
40			71
50			83
60			68
70		5	69
80			70
90			70
100			69
110		7	80
120			69
130			75
140			77
150			70
160			72
170			84
180			74
Participant 13
Time	Step	Report	Heart rate	Activity
0			96	lower
10		6	84
20	40		76
30			73
40			74
50			72
60	80	2	95
70			76
80			76
90			76
100			74
110			74
120			74
130		3	75
140			75
150			75
160	12	4	75
170			95
180	23		98
Participant 14
Time	Step	Report	Heart rate	Activity
0			94	High
10	50	4	81
20			83
30			83
40			98
50	91		82
60			104
70	186		104
80			98
90			88
100	49		101
110	118	4	104
120			99
130	241		105
140	191		106
150			98
160	165		100
170	191	6	101
180			92
Participant 15
Time	Step	Report	Heart rate	Activity
0			84	medium
10		5	92
20			78
30			77
40	15		77
50	59	5	90
60			92
70	57		89
80			81
90			77
100			73
110			89
120			98
130	115	1	89
140			78
150	45		73
160			72
170	9	5	86
180	20		73
Participant 16
Time	Step	Report	Heart rate	Activity
0			97	medium
10	7	0	125
20	35		87
30			92
40	75		90
50	110	5	93
60	134		81
70			88
80	11		101
90			87
100			86
110	146		85
120		6	87
130			78
140			79
150			71
160			78
170			83
180			84
Participant 17
Time	Step	Report	Heart rate	Activity
0			76	lower
10			79
20	10		76
30			81
40			87
50	38		86
60			86
70		0	82
80	43		84
90			87
100	120		86
110			94
120			92
130	13		88
140	38	0	82
150			73
160	28		78
170		2	63
180		2	67
Participant 22
Time	Step	Report	Heart rate	Activity
0		2	88	medium
10			106
20	125		97
30			87
40	50		90
50	49		75
60			70
70	146	7	67
80			66
90		9	81
100	11		93
110	99		78
120			86
130	19		78
140			78
150			66
160	29		66
170			66
180			72
Participant 23
Time	Step	Report	Heart rate	Activity
0		0	86	lower
10			74
20	36		98
30	108	0	79
40			67
50	13		64
60			65
70			64
80			64
90			65
100			62
110		0	56
120	32		57
130			60
140		0	73
150	139		60
160			60
170		0	59
180	308		59
Participant 24
Time	Step	Report	Heart rate	Activity
0			66	High
10	126		75
20			88
30	353		98
40			52
50		2	51
60	185		High
70			74
80			62
90	221		72
100	11		75
110			68
120			75
130	13	1	56
140		0	57
150		5	57
160			57
170	13		57
180	70		52

## Sheet: Dispositive data
Participant 1								Observed Frequencies	0	1	2	3	4	5	6	7	8	9	10		expected frequency											Chi squard
Time	Steps	Report	Heart rate		Report	Number report	Steps	Number RC	Total RC-R	Total RC-R	Total RC-R	Total RC-R	Total RC-R	Total RC-R	Total RC-R	Total RC-R	Total RC-R	Total RC-R	Total RC-R	Total	frequency 0	frequency 1	frequency 2	frequency 3	frequency 4	frequency 5	frequency 6	frequency 7	frequency 8	frequency 9	frequency 10	Chi squard 0	Chi squard 1	Chi squard 2	Chi squard 3	Chi squard 4	Chi squard 5	Chi squard 6	Chi squard 7	Chi squard 8	Chi squard o 9	Chi squard 10		Chi squard	Chi tabular	95% reliability	GL
0		3	77		0	11	7	2	0	0	0	0	0	0	0	0	0	0	0	0	0	0	0	0	0	0	0	0	0	0	0	Error	Error	Error	Error	Error	Error	Error	Error	Error	Error	Error		180.208	800.4		750
10			65		1	3	8	0	0	0	0	0	0	0	0	0	0	0	0	0	0	0	0	0	0	0	0	0	0	0	0	Error	Error	Error	Error	Error	Error	Error	Error	Error	Error	Error			the null hypothesis is rejected
20	104		76		2	5	9	2	0	0	0	0	0	0	0	0	0	0	0	0	0	0	0	0	0	0	0	0	0	0	0	Error	Error	Error	Error	Error	Error	Error	Error	Error	Error	Error
30			72		3	5	10	1	0	0	0	0	0	0	0	0	0	0	0	0	0	0	0	0	0	0	0	0	0	0	0	Error	Error	Error	Error	Error	Error	Error	Error	Error	Error	Error
40	36		73		4	6	11	4	0	0	0	0	0	0	0	0	0	0	0	0	0	0	0	0	0	0	0	0	0	0	0	Error	Error	Error	Error	Error	Error	Error	Error	Error	Error	Error
50			70		5	12	12	1	0	0	0	0	0	0	0	0	0	0	0	0	0	0	0	0	0	0	0	0	0	0	0	Error	Error	Error	Error	Error	Error	Error	Error	Error	Error	Error
60	112		72		6	7	13	6	0	0	0	0	0	0	0	0	0	0	0	0	0	0	0	0	0	0	0	0	0	0	0	Error	Error	Error	Error	Error	Error	Error	Error	Error	Error	Error
70			72		7	5	14	0	0	0	0	0	0	0	0	0	0	0	0	0	0	0	0	0	0	0	0	0	0	0	0	Error	Error	Error	Error	Error	Error	Error	Error	Error	Error	Error
80			69		8	4	15	1	0	0	0	0	0	0	0	0	0	0	0	0	0	0	0	0	0	0	0	0	0	0	0	Error	Error	Error	Error	Error	Error	Error	Error	Error	Error	Error
90			69		9	1	16	1	0	0	0	0	0	0	0	0	0	0	0	0	0	0	0	0	0	0	0	0	0	0	0	Error	Error	Error	Error	Error	Error	Error	Error	Error	Error	Error
100			61		10	3	17	2	0	0	0	0	0	0	0	0	0	0	0	0	0	0	0	0	0	0	0	0	0	0	0	Error	Error	Error	Error	Error	Error	Error	Error	Error	Error	Error
110			65		11	62	18	0	0	0	0	0	0	0	0	0	0	0	0	0	0	0	0	0	0	0	0	0	0	0	0	Error	Error	Error	Error	Error	Error	Error	Error	Error	Error	Error
120			64				19	3	0	0	0	0	0	0	0	0	0	0	0	0	0	0	0	0	0	0	0	0	0	0	0	Error	Error	Error	Error	Error	Error	Error	Error	Error	Error	Error
130			69				20	1	0	0	0	0	0	0	0	0	0	0	0	0	0	0	0	0	0	0	0	0	0	0	0	Error	Error	Error	Error	Error	Error	Error	Error	Error	Error	Error
140			68				21	0	0	0	0	0	0	0	0	0	0	0	0	0	0	0	0	0	0	0	0	0	0	0	0	Error	Error	Error	Error	Error	Error	Error	Error	Error	Error	Error
150			67				22	0	0	0	0	0	0	0	0	0	0	0	0	0	0	0	0	0	0	0	0	0	0	0	0	Error	Error	Error	Error	Error	Error	Error	Error	Error	Error	Error
160			68				23	1	0	0	0	0	0	0	0	0	0	0	0	0	0	0	0	0	0	0	0	0	0	0	0	Error	Error	Error	Error	Error	Error	Error	Error	Error	Error	Error
170			72				24	0	0	0	0	0	0	0	0	0	0	0	0	0	0	0	0	0	0	0	0	0	0	0	0	Error	Error	Error	Error	Error	Error	Error	Error	Error	Error	Error
180			66				25	0	0	0	0	0	0	0	0	0	0	0	0	0	0	0	0	0	0	0	0	0	0	0	0	Error	Error	Error	Error	Error	Error	Error	Error	Error	Error	Error
Participant 2							26	2	0	0	0	0	0	0	0	0	0	0	0	0	0	0	0	0	0	0	0	0	0	0	0	Error	Error	Error	Error	Error	Error	Error	Error	Error	Error	Error
0		4	77				27	0	0	0	0	0	0	0	0	0	0	0	0	0	0	0	0	0	0	0	0	0	0	0	0	Error	Error	Error	Error	Error	Error	Error	Error	Error	Error	Error
10	26		75				28	1	0	0	0	0	0	0	0	0	0	0	0	0	0	0	0	0	0	0	0	0	0	0	0	Error	Error	Error	Error	Error	Error	Error	Error	Error	Error	Error
20			71				29	1	0	0	0	0	0	0	0	0	0	0	0	0	0	0	0	0	0	0	0	0	0	0	0	Error	Error	Error	Error	Error	Error	Error	Error	Error	Error	Error
30			70				30	0	0	0	0	0	0	0	0	0	0	0	0	0	0	0	0	0	0	0	0	0	0	0	0	Error	Error	Error	Error	Error	Error	Error	Error	Error	Error	Error
40		4	81				31	0	0	0	0	0	0	0	0	0	0	0	0	0	0	0	0	0	0	0	0	0	0	0	0	Error	Error	Error	Error	Error	Error	Error	Error	Error	Error	Error
50	43		82				32	1	0	0	0	0	0	0	0	0	0	0	0	0	0	0	0	0	0	0	0	0	0	0	0	Error	Error	Error	Error	Error	Error	Error	Error	Error	Error	Error
60			80				33	0	0	0	0	0	0	0	0	0	0	0	0	0	0	0	0	0	0	0	0	0	0	0	0	Error	Error	Error	Error	Error	Error	Error	Error	Error	Error	Error
70	11		80				34	0	0	0	0	0	0	0	0	0	0	0	0	0	0	0	0	0	0	0	0	0	0	0	0	Error	Error	Error	Error	Error	Error	Error	Error	Error	Error	Error
80			74				35	1	0	0	0	0	0	0	0	0	0	0	0	0	0	0	0	0	0	0	0	0	0	0	0	Error	Error	Error	Error	Error	Error	Error	Error	Error	Error	Error
90			86				36	2	0	0	0	0	0	0	0	0	0	0	0	0	0	0	0	0	0	0	0	0	0	0	0	Error	Error	Error	Error	Error	Error	Error	Error	Error	Error	Error
100	26		86				37	1	0	0	0	0	0	0	0	0	0	0	0	0	0	0	0	0	0	0	0	0	0	0	0	Error	Error	Error	Error	Error	Error	Error	Error	Error	Error	Error
110			86				38	2	0	0	0	0	0	0	0	0	0	0	0	0	0	0	0	0	0	0	0	0	0	0	0	Error	Error	Error	Error	Error	Error	Error	Error	Error	Error	Error
120			95				39	0	0	0	0	0	0	0	0	0	0	0	0	0	0	0	0	0	0	0	0	0	0	0	0	Error	Error	Error	Error	Error	Error	Error	Error	Error	Error	Error
130			96				40	1	0	0	0	0	0	0	0	0	0	0	0	0	0	0	0	0	0	0	0	0	0	0	0	Error	Error	Error	Error	Error	Error	Error	Error	Error	Error	Error
140			95				41	1	0	0	0	0	0	0	0	0	0	0	0	0	0	0	0	0	0	0	0	0	0	0	0	Error	Error	Error	Error	Error	Error	Error	Error	Error	Error	Error
150	9	3	89				42	0	0	0	0	0	0	0	0	0	0	0	0	0	0	0	0	0	0	0	0	0	0	0	0	Error	Error	Error	Error	Error	Error	Error	Error	Error	Error	Error
160	16		74				43	2	0	0	0	0	0	0	0	0	0	0	0	0	0	0	0	0	0	0	0	0	0	0	0	Error	Error	Error	Error	Error	Error	Error	Error	Error	Error	Error
170	17		91				44	0	0	0	0	0	0	0	0	0	0	0	0	0	0	0	0	0	0	0	0	0	0	0	0	Error	Error	Error	Error	Error	Error	Error	Error	Error	Error	Error
180			85				45	3	0	0	0	0	0	0	0	0	0	0	0	0	0	0	0	0	0	0	0	0	0	0	0	Error	Error	Error	Error	Error	Error	Error	Error	Error	Error	Error
Participant 3							46	0	0	0	0	0	0	0	0	0	0	0	0	0	0	0	0	0	0	0	0	0	0	0	0	Error	Error	Error	Error	Error	Error	Error	Error	Error	Error	Error
0		10	98				47	0	0	0	0	0	0	0	0	0	0	0	0	0	0	0	0	0	0	0	0	0	0	0	0	Error	Error	Error	Error	Error	Error	Error	Error	Error	Error	Error
10	67		96				48	0	0	0	0	0	0	0	0	0	0	0	0	0	0	0	0	0	0	0	0	0	0	0	0	Error	Error	Error	Error	Error	Error	Error	Error	Error	Error	Error
20	230	8	93				49	2	0	0	0	0	0	0	0	0	0	0	0	0	0	0	0	0	0	0	0	0	0	0	0	Error	Error	Error	Error	Error	Error	Error	Error	Error	Error	Error
30	631		116				50	3	0	0	0	0	0	0	0	0	0	0	0	0	0	0	0	0	0	0	0	0	0	0	0	Error	Error	Error	Error	Error	Error	Error	Error	Error	Error	Error
40			97				51	0	0	0	1	0	0	0	0	0	0	0	0	1	0.2	0.0285714	0.0857143	0.0571429	0.142857	0.171429	0.114286	0.0857143	0.0857143	0.0285714	0	0.2	0.0285714	9.75238	0.0571429	0.142857	0.171429	0.114286	0.0857143	0.0857143	0.0285714	Error
50	552		92				52	1	0	0	0	0	0	0	0	0	0	0	0	0	0	0	0	0	0	0	0	0	0	0	0	Error	Error	Error	Error	Error	Error	Error	Error	Error	Error	Error
60	173		95				53	0	0	0	0	0	0	0	0	0	0	0	0	0	0	0	0	0	0	0	0	0	0	0	0	Error	Error	Error	Error	Error	Error	Error	Error	Error	Error	Error
70		7	91				54	1	0	0	0	0	0	0	0	0	0	0	0	0	0	0	0	0	0	0	0	0	0	0	0	Error	Error	Error	Error	Error	Error	Error	Error	Error	Error	Error
80	148		90				55	0	0	0	0	0	0	0	0	0	0	0	0	0	0	0	0	0	0	0	0	0	0	0	0	Error	Error	Error	Error	Error	Error	Error	Error	Error	Error	Error
90			95				56	0	1	1	0	0	0	0	0	0	0	0	0	2	0.4	0.0571429	0.171429	0.114286	0.285714	0.342857	0.228571	0.171429	0.171429	0.0571429	0	0.9	15.5571	0.171429	0.114286	0.285714	0.342857	0.228571	0.171429	0.171429	0.0571429	Error
100	123		87				57	1	1	0	0	0	0	1	0	0	0	0	0	2	0.4	0.0571429	0.171429	0.114286	0.285714	0.342857	0.228571	0.171429	0.171429	0.0571429	0	0.9	0.0571429	0.171429	0.114286	0.285714	1.25952	0.228571	0.171429	0.171429	0.0571429	Error
110		4	80				58	0	0	0	0	0	0	0	0	0	0	0	0	0	0	0	0	0	0	0	0	0	0	0	0	Error	Error	Error	Error	Error	Error	Error	Error	Error	Error	Error
120			88				59	1	1	0	0	0	0	0	0	0	0	0	0	1	0.2	0.0285714	0.0857143	0.0571429	0.142857	0.171429	0.114286	0.0857143	0.0857143	0.0285714	0	3.2	0.0285714	0.0857143	0.0571429	0.142857	0.171429	0.114286	0.0857143	0.0857143	0.0285714	Error
130			95				60	1	0	0	0	0	0	0	0	0	0	0	0	0	0	0	0	0	0	0	0	0	0	0	0	Error	Error	Error	Error	Error	Error	Error	Error	Error	Error	Error
140			91				61	1	0	0	0	0	0	0	0	0	0	0	0	0	0	0	0	0	0	0	0	0	0	0	0	Error	Error	Error	Error	Error	Error	Error	Error	Error	Error	Error
150	60	3	107				62	0	0	0	0	0	0	0	0	0	0	0	0	0	0	0	0	0	0	0	0	0	0	0	0	Error	Error	Error	Error	Error	Error	Error	Error	Error	Error	Error
160	617		83				63	0	0	0	1	0	0	0	0	0	0	0	0	1	0.2	0.0285714	0.0857143	0.0571429	0.142857	0.171429	0.114286	0.0857143	0.0857143	0.0285714	0	0.2	0.0285714	9.75238	0.0571429	0.142857	0.171429	0.114286	0.0857143	0.0857143	0.0285714	Error
170			85				64	0	0	0	0	0	0	1	1	0	0	0	0	2	0.4	0.0571429	0.171429	0.114286	0.285714	0.342857	0.228571	0.171429	0.171429	0.0571429	0	0.4	0.0571429	0.171429	0.114286	0.285714	1.25952	2.60357	0.171429	0.171429	0.0571429	Error
180	488		83				65	0	0	0	0	0	0	0	0	0	0	0	0	0	0	0	0	0	0	0	0	0	0	0	0	Error	Error	Error	Error	Error	Error	Error	Error	Error	Error	Error
Participant 5							66	0	0	0	0	0	0	0	0	0	1	0	0	1	0.2	0.0285714	0.0857143	0.0571429	0.142857	0.171429	0.114286	0.0857143	0.0857143	0.0285714	0	0.2	0.0285714	0.0857143	0.0571429	0.142857	0.171429	0.114286	0.0857143	9.75238	0.0285714	Error
0		5	72				67	1	0	0	1	0	0	0	0	1	0	0	0	2	0.4	0.0571429	0.171429	0.114286	0.285714	0.342857	0.228571	0.171429	0.171429	0.0571429	0	0.4	0.0571429	4.00476	0.114286	0.285714	0.342857	0.228571	4.00476	0.171429	0.0571429	Error
10		8	66				68	1	0	0	0	0	0	0	0	1	0	0	0	1	0.2	0.0285714	0.0857143	0.0571429	0.142857	0.171429	0.114286	0.0857143	0.0857143	0.0285714	0	0.2	0.0285714	0.0857143	0.0571429	0.142857	0.171429	0.114286	9.75238	0.0857143	0.0285714	Error
20			64				69	0	0	0	0	0	0	1	0	0	0	0	0	1	0.2	0.0285714	0.0857143	0.0571429	0.142857	0.171429	0.114286	0.0857143	0.0857143	0.0285714	0	0.2	0.0285714	0.0857143	0.0571429	0.142857	4.00476	0.114286	0.0857143	0.0857143	0.0285714	Error
30			59				70	1	0	0	0	0	0	0	0	0	0	0	0	0	0	0	0	0	0	0	0	0	0	0	0	Error	Error	Error	Error	Error	Error	Error	Error	Error	Error	Error
40			59				71	0	0	0	0	0	0	0	0	0	0	0	0	0	0	0	0	0	0	0	0	0	0	0	0	Error	Error	Error	Error	Error	Error	Error	Error	Error	Error	Error
50			62				72	1	0	0	0	0	0	1	0	0	0	0	0	1	0.2	0.0285714	0.0857143	0.0571429	0.142857	0.171429	0.114286	0.0857143	0.0857143	0.0285714	0	0.2	0.0285714	0.0857143	0.0571429	0.142857	4.00476	0.114286	0.0857143	0.0857143	0.0285714	Error
60	13		62				73	1	1	0	0	0	0	1	0	0	0	0	0	2	0.4	0.0571429	0.171429	0.114286	0.285714	0.342857	0.228571	0.171429	0.171429	0.0571429	0	0.9	0.0571429	0.171429	0.114286	0.285714	1.25952	0.228571	0.171429	0.171429	0.0571429	Error
70		8	74				74	0	0	0	0	0	0	0	0	0	1	0	0	1	0.2	0.0285714	0.0857143	0.0571429	0.142857	0.171429	0.114286	0.0857143	0.0857143	0.0285714	0	0.2	0.0285714	0.0857143	0.0571429	0.142857	0.171429	0.114286	0.0857143	9.75238	0.0285714	Error
80	45		65				75	1	0	0	0	1	1	0	0	0	0	0	0	2	0.4	0.0571429	0.171429	0.114286	0.285714	0.342857	0.228571	0.171429	0.171429	0.0571429	0	0.4	0.0571429	0.171429	6.86429	1.78571	0.342857	0.228571	0.171429	0.171429	0.0571429	Error
90			71				76	0	0	0	0	0	0	0	1	0	0	0	0	1	0.2	0.0285714	0.0857143	0.0571429	0.142857	0.171429	0.114286	0.0857143	0.0857143	0.0285714	0	0.2	0.0285714	0.0857143	0.0571429	0.142857	0.171429	6.86429	0.0857143	0.0857143	0.0285714	Error
100			92				77	0	0	0	0	1	1	0	0	0	0	0	0	2	0.4	0.0571429	0.171429	0.114286	0.285714	0.342857	0.228571	0.171429	0.171429	0.0571429	0	0.4	0.0571429	0.171429	6.86429	1.78571	0.342857	0.228571	0.171429	0.171429	0.0571429	Error
110			57				78	0	0	0	0	0	0	1	0	0	0	0	0	1	0.2	0.0285714	0.0857143	0.0571429	0.142857	0.171429	0.114286	0.0857143	0.0857143	0.0285714	0	0.2	0.0285714	0.0857143	0.0571429	0.142857	4.00476	0.114286	0.0857143	0.0857143	0.0285714	Error
120			57				79	0	1	0	0	0	0	0	2	0	0	0	0	3	0.6	0.0857143	0.257143	0.171429	0.428571	0.514286	0.342857	0.257143	0.257143	0.0857143	0	0.266667	0.0857143	0.257143	0.171429	0.428571	0.514286	8.00952	0.257143	0.257143	0.0857143	Error
130			57				80	1	0	0	0	0	1	0	0	1	0	0	0	2	0.4	0.0571429	0.171429	0.114286	0.285714	0.342857	0.228571	0.171429	0.171429	0.0571429	0	0.4	0.0571429	0.171429	0.114286	1.78571	0.342857	0.228571	4.00476	0.171429	0.0571429	Error
140			86				81	0	0	0	0	0	2	0	0	0	1	1	0	4	0.8	0.114286	0.342857	0.228571	0.571429	0.685714	0.457143	0.342857	0.342857	0.114286	0	0.8	0.114286	0.342857	0.228571	3.57143	0.685714	0.457143	0.342857	1.25952	6.86429	Error
150			70				82	0	2	0	0	0	0	0	0	0	0	0	0	2	0.4	0.0571429	0.171429	0.114286	0.285714	0.342857	0.228571	0.171429	0.171429	0.0571429	0	6.4	0.0571429	0.171429	0.114286	0.285714	0.342857	0.228571	0.171429	0.171429	0.0571429	Error
160			71				83	0	0	0	0	0	0	0	0	0	0	0	0	0	0	0	0	0	0	0	0	0	0	0	0	Error	Error	Error	Error	Error	Error	Error	Error	Error	Error	Error
10			75				76	61	7	1	3	2	5	6	4	3	3	1	0	35
20	7		82
30	17		84
40	270		73
50			68
60			68
70			67
80			72
90			66
100			67
110		10	108
120			84
130	50		84
140		10	86
150			118
160	361		80
170			81
180			67
Participant 7
0		0	87
10			84
20			86
30			92
40	106		94
50	72		110
60			93
70	68		90
80			88
90		0	100
100	73		109
110	45		105
120		1	107
130	41		97
140	19		94
150			96
160			97
170	54		92
180			100
Participant 8
0			88
10	19	5	94
20			95
30			70
40			72
50	104		64
60	37	6	79
70			102
80			78
90	13	7	68
100			67
110			65
120		6	76
130			66
140	61		105
150			69
160			56
170			66
180	52		62
Participant 9
0	0	3	95
10	0		82
20	0		93
30	0		84
40	0		124
50	0		91
60	0		82
70	0		96
80	0		120
90	0		92
100	0		95
110	0		94
120	0		92
130	0		91
140	0		126
150	0		114
160	0		86
170	0		114
180	0		84
Participant 10
0		7	87
10			80
20			91
30
40			105
50		8	81
60			83
70			87
80			72
90			71
100			81
110			75
120		6	79
130			79
140			82
150			81
160			83
170			78
180			68
Participant 11
0		5	84
10		5	73
20			78
30			78
40			64
50		5	64
60			59
70			57
80			62
90			62
100			63
110			68
120			70
130			67
140		6	64
150			71
160			67
170			67
180			65
Participant 12
0		5	78
10			62
20			74
30			70
40			71
50			83
60			68
70		5	69
80			70
90			70
100			69
110		7	80
120			69
130			75
140			77
150			70
160			72
170			84
180			74
Participant 13
0			96
10		6	84
20	40		76
30			73
40			74
50			72
60	80	2	95
70			76
80			76
90			76
100			74
110			74
120			74
130		3	75
140			75
150			75
160	12	4	75
170			95
180	23		98
Participant 14
0			94
10	50	4	81
20			83
30			83
40			98
50	91		82
60			104
70	186		104
80			98
90			88
100	49		101
110	118	4	104
120			99
130	241		105
140	191		106
150			98
160	165		100
170	191	6	101
180			92
Participant 15
0			84
10		5	92
20			78
30			77
40	15		77
50	59	5	90
60			92
70	57		89
80			81
90			77
100			73
110			89
120			98
130	115	1	89
140			78
150	45		73
160			72
170	9	5	86
180	20		73
Participant 16
0			97
10	7	0	125
20	35		87
30			92
40	75		90
50	110	5	93
60	134		81
70			88
80	11		101
90			87
100			86
110	146		85
120		6	87
130			78
140			79
150			71
160			78
170			83
180			84
Participant 17
0			76
10			79
20	10		76
30			81
40			87
50	38		86
60			86
70		0	82
80	43		84
90			87
100	120		86
110			94
120			92
130	13		88
140	38	0	82
150			73
160	28		78
170		2	63
180		2	67
Participant 22
0		2	88
10			106
20	125		97
30			87
40	50		90
50	49		75
60			70
70	146	7	67
80			66
90		9	81
100	11		93
110	99		78
120			86
130	19		78
140			78
150			66
160	29		66
170			66
180			72
Participant 23
0		0	86
10			74
20	36		98
30	108	0	79
40			67
50	13		64
60			65
70			64
80			64
90			65
100			62
110		0	56
120	32		57
130			60
140		0	73
150	139		60
160			60
170		0	59
180	308		59
Participant 24
0			66
10	126		75
20			88
30	353		98
40			52
50		2	51
60	185		59
70			74
80			62
90	221		72
100	11		75
110			68
120			75
130	13	1	56
140		0	57
150		5	57
160			57
170	13		57
180	70		52

## Sheet: Interfiere
Participant	Sex	Live for	General activity	Emotional state	walking ability	work	relationships with other people	Sleep	Enjoy life	Comment
1	F	Home	5	0	7	6	0	8	5
2	F	Home	0	3	3	0	3	0	0
3	F	Home	5	1	1	3	3	1	9
4	M	Home	5	7	7	6	4	7	5
5	M	Nursing home	8	7	9		7	8	8	No work
6	M	Nursing home	0	0	5		0	0	0	No work
7	M	Nursing home	0	0	0		0	0	0	It doesn't work, he says it doesn't interfere but when he got up he was sore
8	M	Nursing home	8	8	5		5	4	5	No work
9	M	Nursing home	10	10	10		0	8	10	No work
10	M	Nursing home	3	3	4		4	5	5	No work
11	M	Nursing home	8	6	9		0	9	1	No work
12	M	Nursing home	9	4			5	3	10	He doesn't walk, he doesn't work
13	M	Home	6	0	3	4	2	5	7
14	F	Home	2	0	1	2	0	3	0
15	F	Home	6	7	8		7	7	7	No work
16	F	Home	5	8	0	3	0	4	5
17	F	Home	0	0	0	0	0	0	0	pain was removed with therapy
18	F	Home	4	4	0	0	0	0	0	make job even with pain
19	M	Home	6	5	0	9	0	0	0
20	F	Home	5	0	0	8	0	0	5
21	M	Home	1	0	1	1	0	0	0
22	M	Nursing home	3	4	6		5	0	0	No work
23	F	Nursing home	5	0	5		0	0	0	No work
24	F	Nursing home	0	0	0		0	0	0	No work
Average			4.33333	3.20833	3.65217	3.5	1.875	3	3.41667

## Sheet: Report
P1	Report	Date/time
Pain	3	2018-01-20 18:46:58
HR	69, 77, 81
Activity	High, walking	Media
climb stairs	0
Steps	252		104	36	112	252
Depresion	y
Anxiety	y
When report?	did not report more because the pain did not change, it remained
P2	Report	Date/time	Report	Date/time	Report	Date/time
Pain	4	2018-01-21 17:23:44	4	2018-01-21 18:01:59	3	2018-01-21 19:46:26
HR	77, 69, 77		81, 70, 74		97, 95, 93
Activity	Low, always sedentary	Media
climb stairs	0
Steps	148	26	43	11	26	9	16	17	148
Depresion	N
Anxiety	N
When report?	When he made movement and felt pain, he reported
P3	Report	Date/time	Report	Date/time	Report	Date/time	Report	Date/time	Report	Date/time
Pain	10	2018-01-22 17:32:50	8	2018-01-22 17:50:33	7	2018-01-22 18:33:17	4	2018-01-22 19:13:01	3	2018-01-22 20:07:15
HR	98, 99, 98		96, 93, 95		92, 92, 92		86, 93, 92		98, 89, 83
Activity	Low, always sedentary	Low
climb stairs	0
Steps	3049	67	230	631	552	173	148	123	60	617	448	3049
Depresion	N
Anxiety	N
When report?	She was in pain, but rested and went down. She reported that she was getting off.
P4	Report	Date/time	Report	Date/time		loosened it
Pain	4	2018-01-25 16:32:43	6	2018-01-25 17:22:22
HR
Activity	Low, always sedentary	Low
climb stairs	0
Steps
Depresion	y
Anxiety	y
When report?	when feel pain
P5	Report	Date/time	Report	Date/time	Report	Date/time
Pain	5	2018-02-05 10:15:59	8	2018-02-05 10:26:31	8	2018-02-05 11:31:20
HR	76, 72, 68		73, 72, 66		77, 79, 87
Activity	Low, always sedentary	low
climb stairs	2 up 3 down
Steps	70	13	45	12	70
Depresion	N
Anxiety	N
When report?	when feel pain
P6	Report	Date/time	Report	Date/time	Report	Date/time
Pain	3	2018-02-07 11:01:03	10	2018-02-07 12:40:30	10	2018-02-07 13:19:02
HR	81, 75, 75		82, 91, 95		84, 82, 104
Activity	Low, sat and walked	Low
climb stairs	0
Steps	642	7	17	207	50	361	642
Depresion	N
Anxiety	N
When report?	when feel pain
P7	Report	Date/time	Report	Date/time	Report	Date/time
Pain	0	2018-02-07 14:26:41	0	2018-02-07 15:48:54	1	2018-02-07 16:24:02
HR	87, 85, 78		88, 93, 99		93, 101, 107
Activity	Medium: Sedentary and walked	Medio
climb stairs	0
Steps	478	106	72	68	73	45	41	19	54	478
Depresion	N
Anxiety	N
When report?	didn't feel pain, he did it because he wanted to
P8	Report	Date/time	Report	Date/time	Report	Date/time	Report	Date/time	gmail
Pain	5	2018-02-08 10:34:18	6	2018-02-08 11:23:32	7	2018-02-08 11:57:43	6	2018-02-08 12:22:38
HR	87, 90, 94		74, 84, 70		69, 75, 68		65, 75, 83
Activity	Low, always sedentary	Low
climb stairs	0
Steps	286	19	104	37	13	61	52	286
Depresion	y
Anxiety	y
When report?
	when feel pain
P9	Report	Date/time	No camina	Usa silla de ruedas
Pain	3	2018-02-08 11:09:49
HR	96, 95, 84
Activity	Low, always sedentary	Low
climb stairs	0
Steps	0	12	281	381	63
Depresion	y
Anxiety	y
When report?	did not report because he felt happy and content, and he forgot the pain
P10	Report	Date/time	Report	Date/time	Report	Date/time
Pain	7	2018-02-12 10:39:53	8	2018-02-12 11:24:21	6	2018-02-12 12:37:43
HR	81, 87, 89		95, 88, 81		70, 79, 79
Activity	Low, always sedentary	Low
climb stairs	0
Steps	0
Depresion	y
Anxiety	y
When report?	When the pain increased
P11	Report	Date/time	Report	Date/time	Report	Date/time	Report	Date/time
Pain	5	2018-02-12 11:14:20	5	2018-02-12 11:23:02	5	2018-02-12 11:55:48	6	2018-02-12 13:30:01
HR	75, 84, 71		67, 73, 76		64, 75, 82		75, 67, 66
Activity	Low, always sedentary	Low
climb stairs	0
Steps	0
Depresion	N
Anxiety	N
When report?	when feel pain
P12	Report	Date/time	Report	Date/time	Report	Date/time
Pain	2	2018-02-12 14:57:59	5	2018-02-12 16:00:51	7	2018-02-12 16:44:03
HR	78, 69		68, 80, 78		84, 78, 72
Activity	Low, always sedentary	Low
climb stairs	0
Steps	0
Depresion	y
Anxiety	N
When report?	Reported low and high, but increasing
P13	Report	Date/time	Report	Date/time	Report	Date/time	Report	Date/time
Pain	6	2018-02-16 20:03:36	2	2018-02-16 20:58:18	3	2018-02-16 22:05:09	4	2018-02-16 22:31:19
HR	96, 98, 96		90, 102, 92		74, 74, 79		75, 75, 82
Activity	Low, always sedentary	Low
climb stairs	0
Steps	155	40	80	12	23	155
Depresion	N
Anxiety	N
When report?	reported that it hurt and that it was going down
P14	Report	Date/time	Report	Date/time	Report	Date/time
Pain	4	2018-02-17 16:27:09	4	2018-02-17 18:12:12	6	2018-02-17 19:12:31
HR	100, 94, 83		97, 106, 107		107, 95, 106
Activity	High, walking	Low
climb stairs	0
Steps	1282	50	91	186	49	118	241	191	165	191	1282
Depresion	N
Anxiety	N
When report?	when feel pain
P15	Report	Date/time	Report	Date/time	Report	Date/time	Report	Date/time
Pain	5	2018-02-17 22:14:08	5	2018-02-17 23:00:11	1	2018-02-17 23:58:44	5	2018-02-18 01:01:36
HR	84, 94, 86		88, 91, 90		84, 75, 82		73, 86, 90
Activity	High, walking	Media
climb stairs	0
Steps	318		15	59	57	115	43	9	20	318
Depresion	y
Anxiety	y
When report?	when feel pain
P16	Report	Date/time	Report	Date/time	Report	Date/time
Pain	0	2018-02-21 14:30:06	5	2018-02-21 15:13:22	6	2018-02-21 16:18:08
HR	92, 91, 88		86, 86, 93		87, 85, 87
Activity	Medium: Sedentary and walked	Media
climb stairs	0
Steps	645	17	35	75	110	134	117	11	146	645
Depresion	y
Anxiety	y
When report?	when feel pain
P17	Report	Date/time	Report	Date/time	Report	Date/time	Report	Date/time
Pain	0	2018-02-21 18:44:27	0	2018-02-21 20:01:21	2	2018-02-21 21:26:59	2	2018-02-21 21:45:04
HR	73, 76, 81		82, 88, 84		74, 69, 78		67, 68, 79
Activity	Low, always sedentary	Low
climb stairs	0
Steps	290	10	38	43	120	13	38	28	290
Depresion	N
Anxiety	N
When report?	when feel pain
P18	Report	Date/time	Report	Date/time	Report	Date/time	Report	Date/time	Report	Date/time	Report	Date/time	Report	Date/time
Pain	0	2018-02-28 19:14:46	0	2018-02-28 19:59:14	0	2018-02-28 20:17:34	0	2018-02-28 20:32:43	0	2018-02-28 20:54:54	0	2018-02-28 21:12:12	0	2018-02-28 21:32:34
HR		High
Activity
climb stairs
Steps
Depresion
Anxiety
When report?	Every so often, approx. 15 minutes
P19	Report	Date/time	Report	Date/time
Pain	6	2018-02-28 19:35:57	6	2018-02-28 21:28:07
HR
Activity
climb stairs
Steps
Depresion
Anxiety
When report?	when feel pain		Media
P20	Report	Date/time	Report	Date/time
	0	2018-03-01 20:33:54	0	2018-03-01 21:28:54
When report?	when feel pain		low
P21	Report	Date/time	Report	Date/time
	0	2018-03-01 21:25:57	0	2018-03-01 22:28:29
When report?	was in no pain, but thought reporting was for the best		Media
P22	Report	Date/time	Report	Date/time	Report	Date/time
Pain	2	2018-03-12 10:55:48	7	2018-03-12 12:03:21	9	2018-03-12 12:23:32
HR	88, 99		66, 67, 67		76, 92, 81
Activity	Medium: Sedentary and walked	Media
climb stairs	0
Steps	528	125	50	49	146	11	99	19	29	528
Depresion	N
Anxiety	N
When report?	when feel pain
P23	Report	Date/time	Report	Date/time	Report	Date/time	Report	Date/time	Report	Date/time
Pain	0	2018-03-13 10:47:45	0	2018-03-13 11:15:42	0	2018-03-13 12:37:27	0	2018-03-13 13:06:48	0	2018-03-13 13:37:33
HR	89, 74, 86		65, 65, 64		62, 61, 62		63, 73, 88		59, 60, 59
Activity	Baja, sedentaria	Low
climb stairs	0
Steps	215	36	108	32	39	308	523
Depresion	N
Anxiety	N
When report?	when feel pain
								Chile
P24	Report	Date/time	Report	Date/time	Report	Date/time	Report	Date/time		Hora de Costa Rica en el reloj
Pain	2	2018-03-13 12:28:37	1	2018-03-13 13:42:47	0	2018-03-13 13:54:17	5	2018-03-13 14:04:36
HR	51, 64, 68		59, 60, 56		57, 57, 67		66, 57, 57
Activity	High, walking	High
climb stairs	0
Steps	1039	126	353	185	221	47	11	13	13	70	1039
Depresion	N
Anxiety	y
When report?	when pain change

## Sheet: Summarize
Participant	When report	Number	will use	Frecuency	benefit
1	I did not use it because the pain remained	1	y	When I had more pain	to communicate to the doctor so that one does not forget	Doctor
2	When feeling pain from movement, when making me stop	3	y	In the house, outside only if necessary	I can mark the frequency of pain, at the moment of pain, that is, I can notify the moment of pain
3	Because I had a pain, and it went away, I lowered it so I could rest	5	y	Once a week to see what activity causes pain	to be evaluated, because you have more pain in the area of ​​the body	knowledge
4	So that the intensity of pain that one reflects in the step can be seen, I felt high pain because with work I feel pain	2	y	Every day	To be able to keep statistics of the pain that one feels day by day, with the dawn that one makes day by day.	knowledge
5	Because I didn't have a way to express it, I would report it when I felt pain, I have chronic pain	3	y	only if necessary	Facilitates communication with the doctor, lightens the work for him	knowledge
6	Because I'm sorry, ... when I felt pain or sat up	3	y	Once a day	one identifies the intensity of the pain during the day
7	Oh, very human, I felt no pain, I did it because I wanted to	3	N	I'm fine, let others use it	because it is good for health for the old
8	I felt discomfort that I have had for days in the cervical, head and hip, when I felt as if they passed current	4	y	Every day	ake advantage of indications that are not known now, it is not known to what extent these pains identify a person	knowledge
9	He did not report because he felt happy	1	y	Every day	It's profitable
10	the pain increased	3	y	per week	Because it helps to see wl pain
11	his leg ached	4	y	2 per week	I put my pain
12	Needed to see your capacity for pain	3	y	per week	One measures the pain, one remembers.	visible
13	Because it hurt a lot and he had less	4	y	two weeks a month	because that's how I carry what the body feels
14	When I was in pain, only when I was in pain, I didn't report that I wasn't in pain because I felt fine.	3	y	Always if you must or 3 times	useful in treatment and beneficial to tell you when pain is felt	knowledge
15	When I felt the pain, I'm used to the pain	4	does not know	It is new for me to mark the intensity of the pain with numbers	I think it's good, measure the amount of pain	visible
16	When I moved my arm I felt pain	3	y	When you have pain, if it waxes and wanes	Aware that I am in pain, I would like an answer	visible
17	Because he did a little touch, he reported it, even if it was a little	4	y	If my arm bothers me to pay attention to it, every half hour	Has a tool to tell the doctor this is my pain	Doctor
18	because it seems to me very necessary to tell one's pain and see from time to time if they had the same pain	7	y	I'd have him taking time by day	To know the evolution of the pain that one has	knowledge
19	Because I felt more pain, when pain increased	2	y	only if necessary	feel safer, you realize if there is more or less pain. Safe is to say more confident	Visible
20	Because it gave me pain, it's ugly to have pain	2	y	depends on the state	If it helps one in the state, more at this age
21	I had no pain, but I thought it was for the best	2	y	weeks	Motivates one to keep track of what one suffers, to know something about myself	knowledge
22	when it decreased	3	y	by body movement	it's like a watch one knows how to use it, it's the same, it has an idea of ​​pain	knowledge
23	When my knee started to hurt	5	y	Times a day	because one sees the pain that one feels and reports it	knowledge
24	It happens to me and I get pain in my body when I walk, it's not much from 3 to 4 and then 0	4	does not know	I must have the habit, I'm forgetful. If I take it seriously, I would use it, if they ask me.	The situation of my pain is being indicated, it is important for the doctor	Doctor
	Average	3.25
